# Supplementary material for: Fabrication and application of flexible EEG dry electrode based on stacked-template method
Source: Royal Society of Chemistry journal article supplement (doi:10.1039/d4tc02664k), 2024-01-01
Supplement: d4tc02664k1.pdf [file d4tc02664k1.pdf]

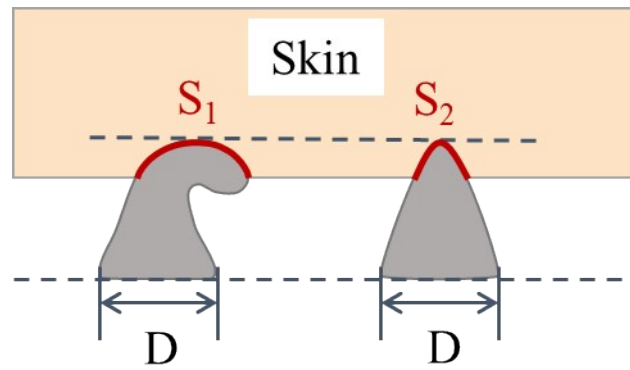

Figure S3 Schematic diagram of barb structure and dome-shaped structure. Compared with the micro dome-shaped electrodes, the unique barb structure of BMS electrodes can maintain a larger contact area with the skin. The pressure of BMS electrodes on the skin is less under the same external pressure, which has a significant comfort of use.

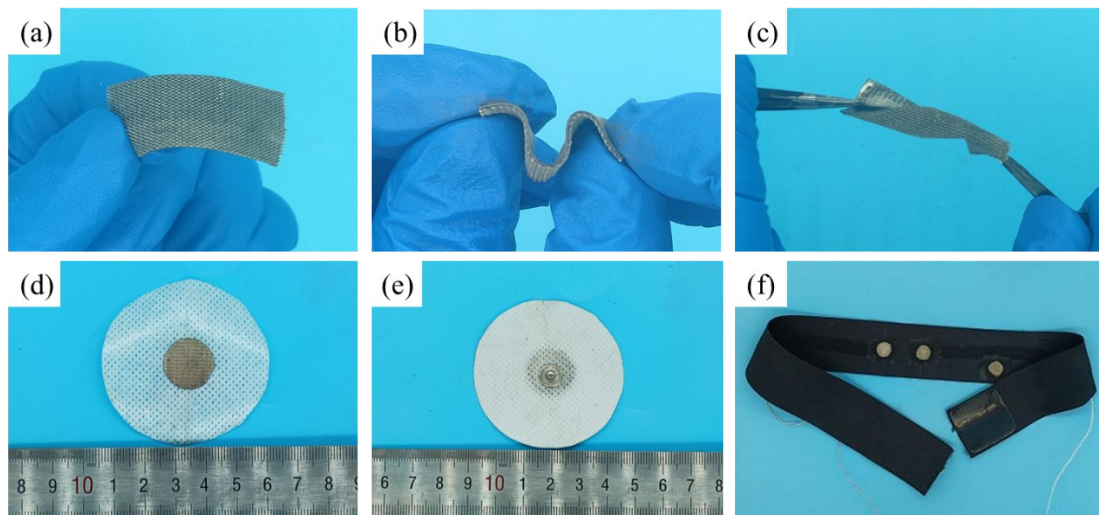

Figure S4 Optical photograph of (a) original TPU BMS film, TPU BMS film under (b) bending and (c) twisting, and optical photograph of EEG electrode patch (d) front view and (e) back view, and EEG testing headband.

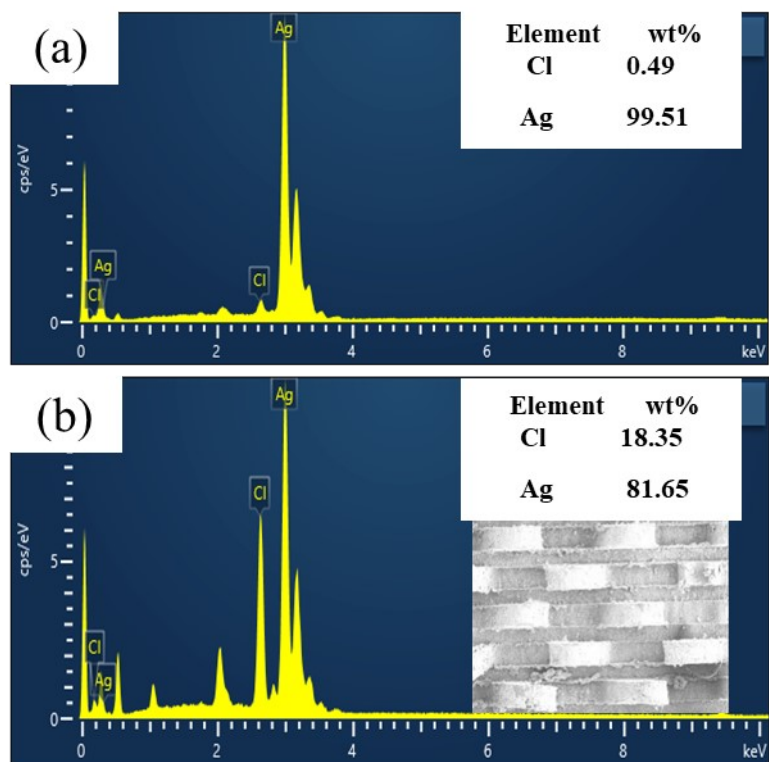

Figure S5 Characteristic X-ray energy spectra (a) before chlorination and (b) after chlorination

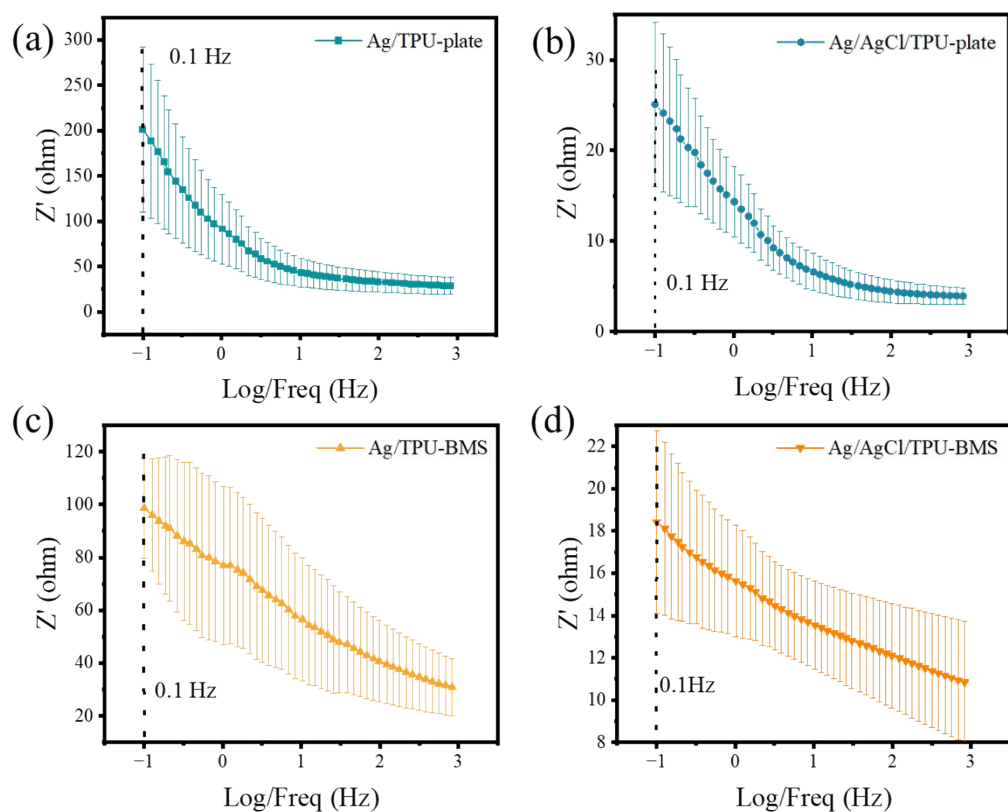

Figure S6 Electrode electrolyte interface: impedance-frequency curve (a) Ag/TPU-plate, (b) Ag/AgCl/TPU-plate, (c) Ag/TPU-BMS, (d) Ag/AgCl/TPU-BMS

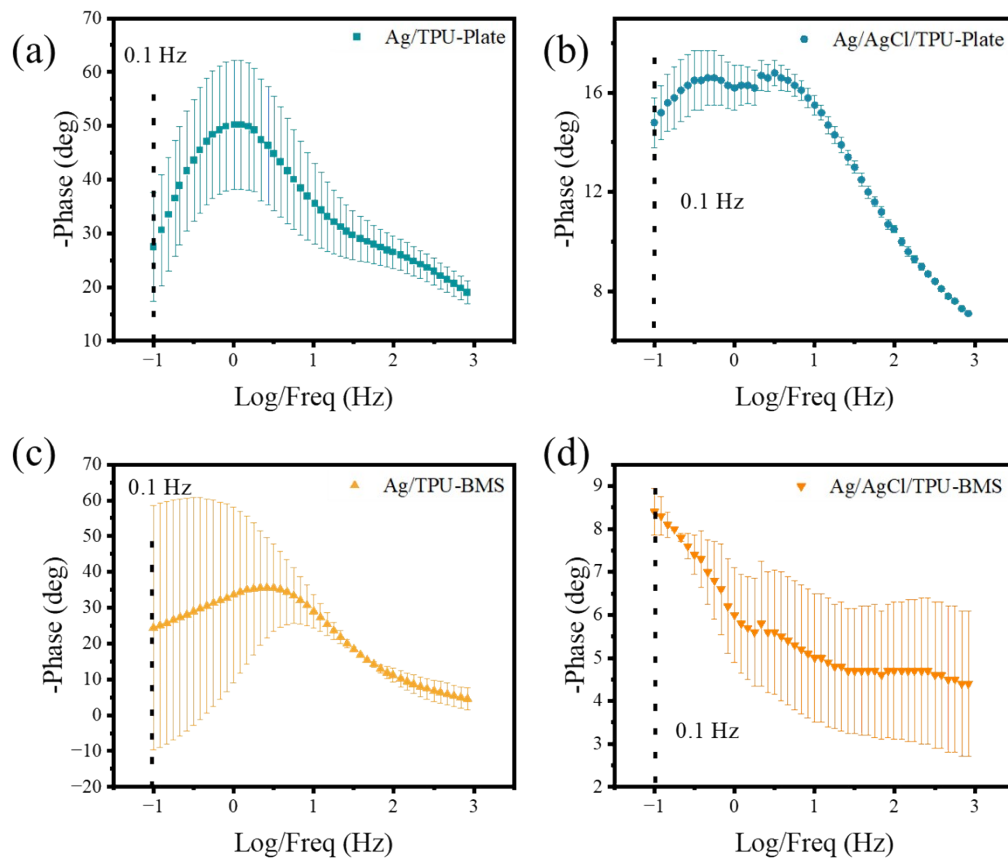

Figure S7 Electrode electrolyte interface: phase degree-frequency curve (a) Ag/TPU-plate, (b) Ag/AgCl/TPU-plate, (c) Ag/TPU-BMS, (d) Ag/AgCl/TPU-BMS

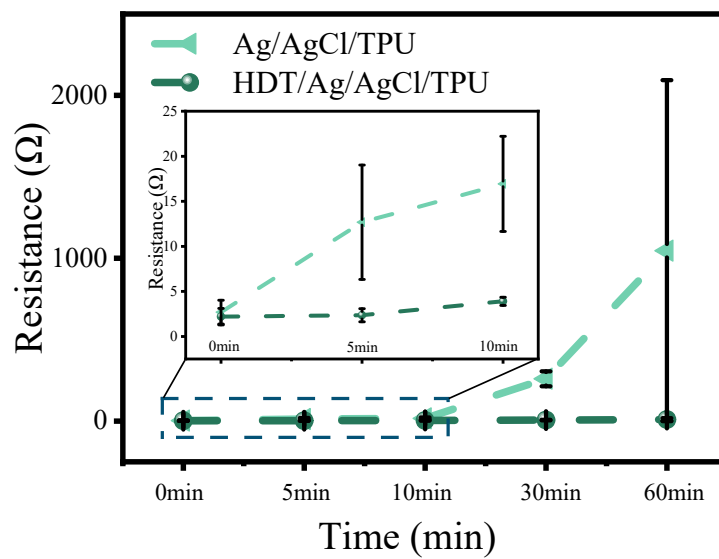

Figure S 8 Changes in resistance after  $\text{Na}_2\text{S}$  corrosion for 0-60min

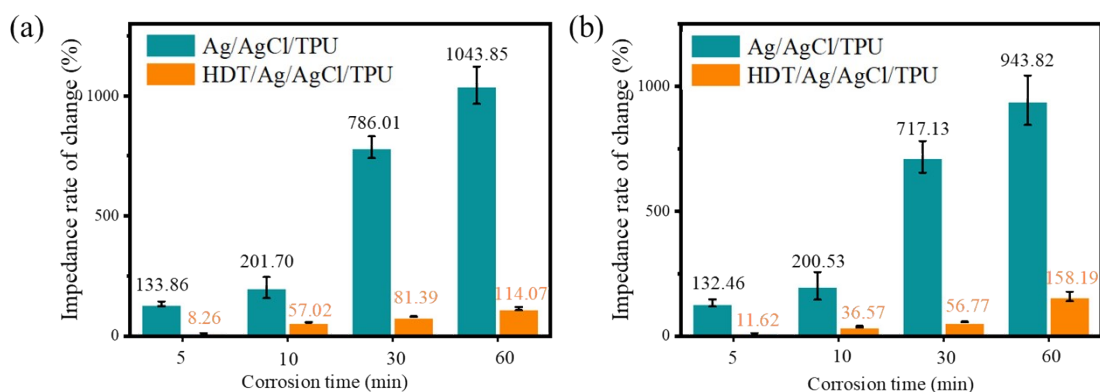

Figure S 9 Impedance rate of change of the electrodes before and after mercaptan treatment in  $\text{Na}_2\text{S}$  solution of (a) 0.1Hz, and (b) 10Hz

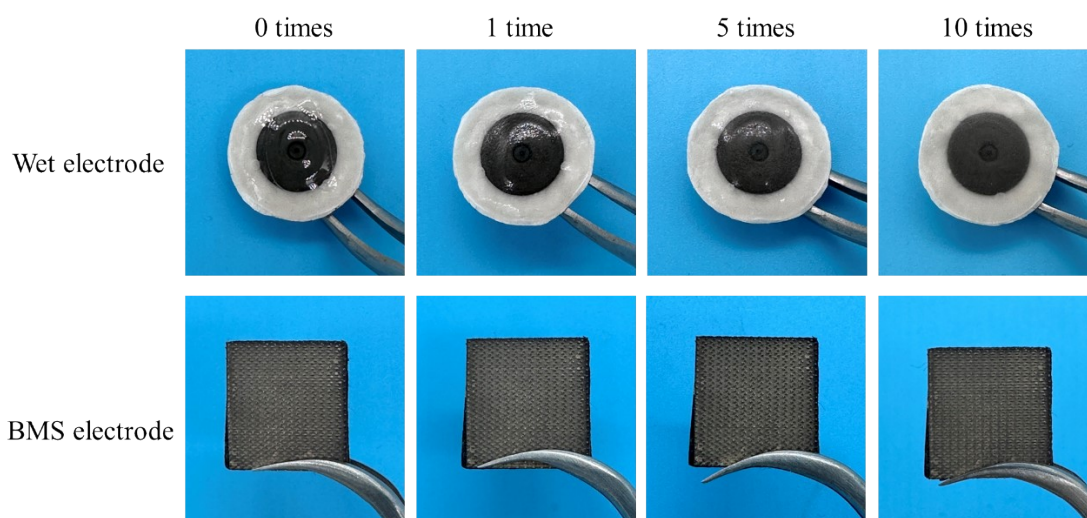

Figure S 10 Optical photographs of wet electrode and BMS electrode be adhered on human skin after 0 times, 1 time, 5times and 10 times

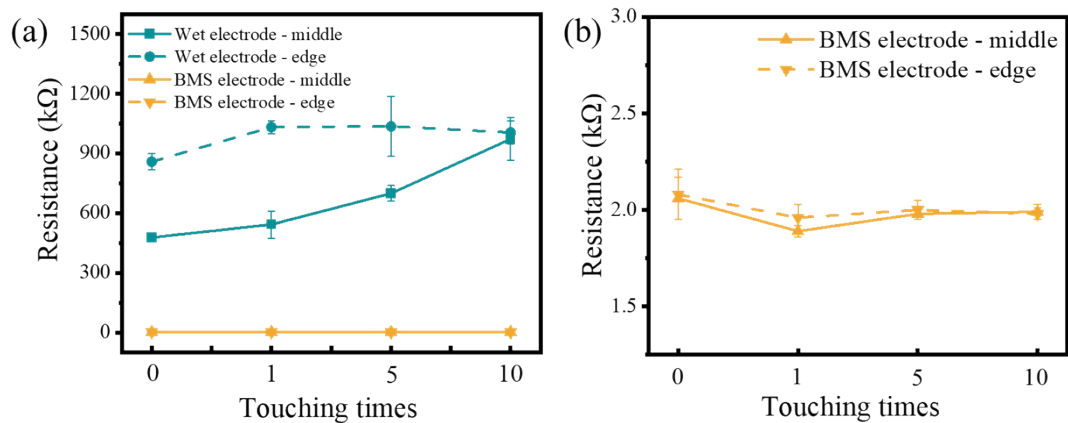

Figure S 11 Resistance of wet electrode and BMS electrode be adhered on human skin after 0 times, 1 time, 5times and 10 times

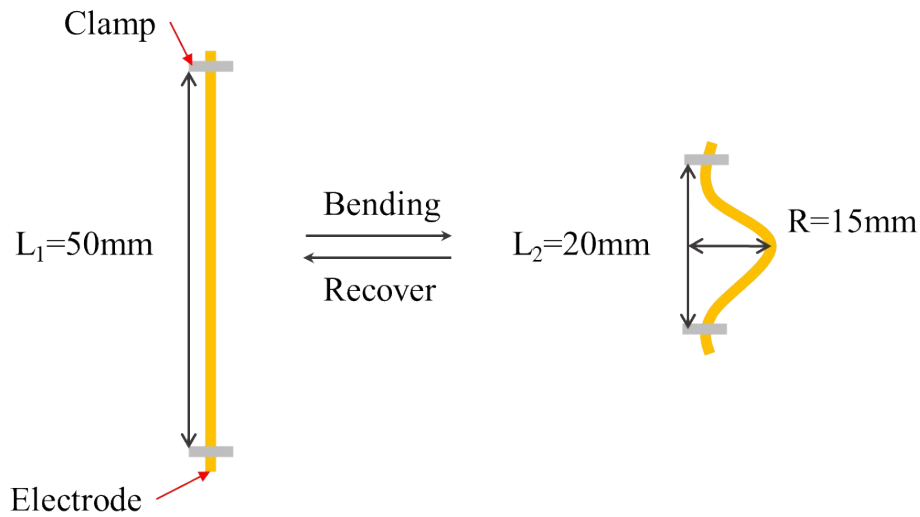

Figure S 12 Schematic diagram of bending test

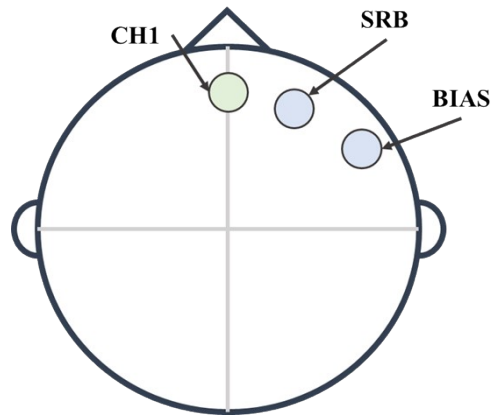

Figure S 13 Schematic diagram of electrodes position for on-body EEG testing

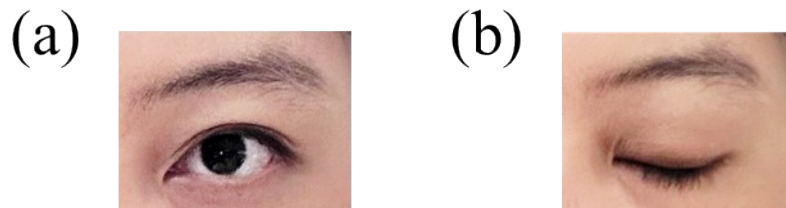

Figure S 14 Photographs of eyes condition for on-body EEG testing (a) calm opening and (b) calm close. Blinking occurs when (a) and (b) repeats.

Table S 1 sample information

| Samples         | Explanation                                                |
|-----------------|------------------------------------------------------------|
| TPU             | The barb microstructure TPU membrane before silver plating |
| Ag/TPU          | The barb microstructure TPU membrane after silver plating  |
| Ag/TPU-plate    | A plate TPU membrane with silver plating                   |
| Ag/TPU-BMS      | A barb microstructure TPU membrane with silver plating     |
| Ag/AgCl/TPU     | A silvered TPU membrane after chlorination                 |
| HDT/Ag/AgCl/TPU | The final electrode, which has a barb microsture TPU       |

|                           |                                                            |
|---------------------------|------------------------------------------------------------|
| Ag/AgCl/TPU-plate (Plate) | membrane, a Ag/AgCl plating, and after mercaptan treatment |
| Ag/AgCl/TPU-BMS (BMS)     | A plate TPU membrane with Ag/AgCl plating                  |
| Wet                       | A barb microstructure TPU membrane with Ag/AgCl plating    |
|                           | The wet electrode                                          |

---
